# Supplementary material for: A Study on the Phytotoxic Potential of the Seasoning Herb Marjoram (Origanum majorana L.) Leaves
Source: MDPI journal article supplement (doi:10.3390/molecules26113356), 2021-06-02
Supplement: s1 [file s1]

## SUPPORTING INFORMATION

# A Study on the Phytotoxic Potential of the Seasoning Herb Marjoram (*Origanum majorana* L.) Leaves

Antonio Cala, José R. Salcedo, Ascensión Torres, Rosa M. Varela, José M. G. Molinillo and Francisco A. Macías\*

Allelopathy Group, Department of Organic Chemistry, School of Science, Institute of Biomolecules (INBIO), University of Cádiz, C/ República Saharaui 7, 11510-Puerto Real, Cadiz, Spain; antonio.cala@uca.es (A.C.), jose.salcesempe@alum.uca.es (J.R.S.S.), chon.torres@uca.es (A.T.); rosa.varela@uca.es (R.M.V.), chema.gonzalez@uca.es, famacias@uca.es (F.A.M.).

\*Correspondence: famacias@uca.es

## Table of Contents

|     |                                                     |
|-----|-----------------------------------------------------|
| S2. | <sup>1</sup> H and <sup>13</sup> C NMR spectra of 4 |
| S3. | COSY spectrum of 4                                  |
| S4. | HSQC and HMBC spectra of 4                          |
| S5. | HRMS spectrum of 4                                  |

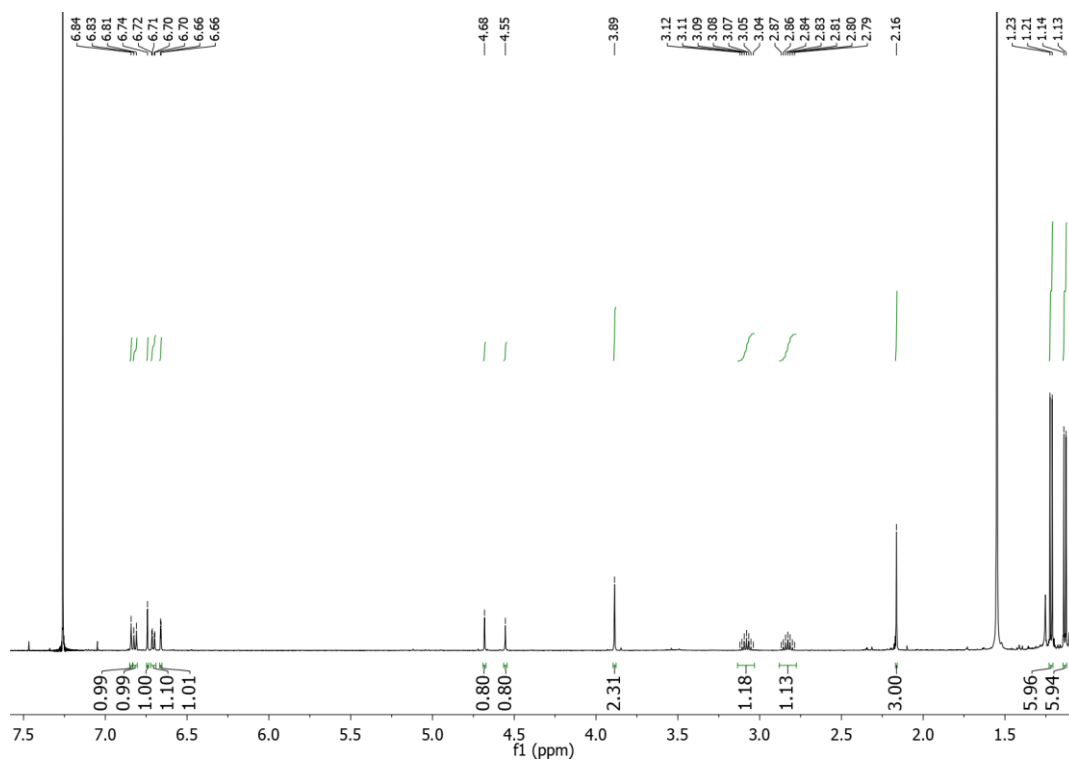

<sup>1</sup>H-NMR Spectrum of 4 (500 MHz, CDCl<sub>3</sub>)

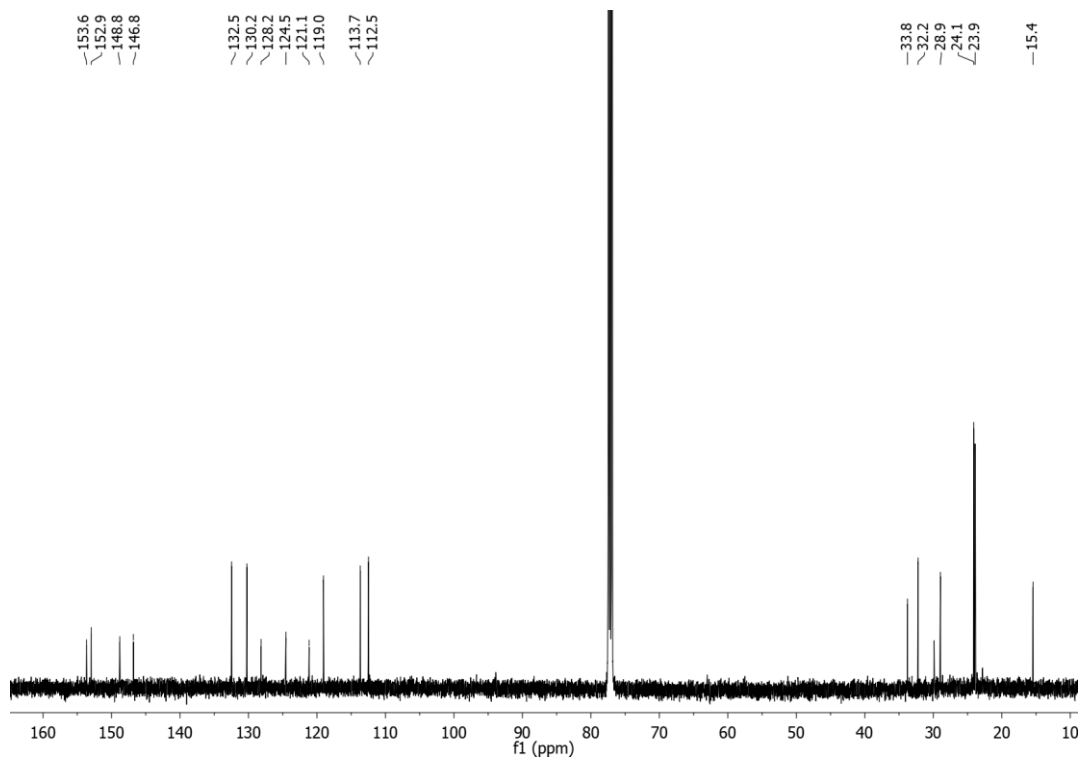

<sup>13</sup>C-NMR Spectrum of 4 (125 MHz, CDCl<sub>3</sub>)

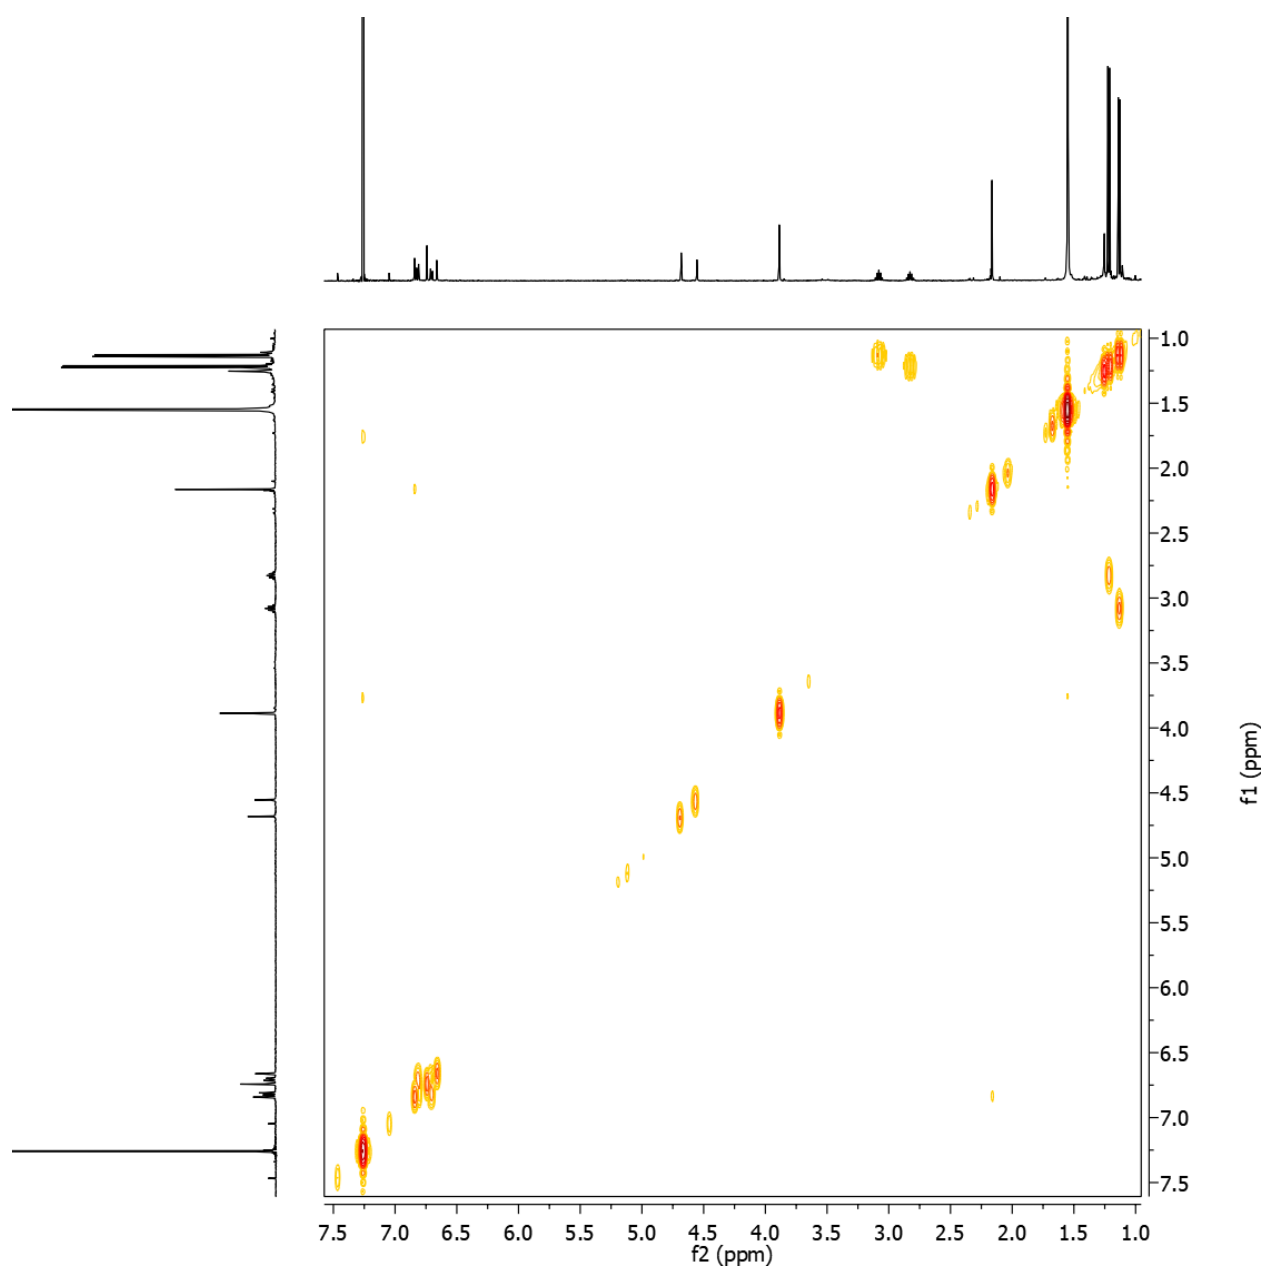

COSY Spectrum of **4** (500MHz, CDCl<sub>3</sub>)

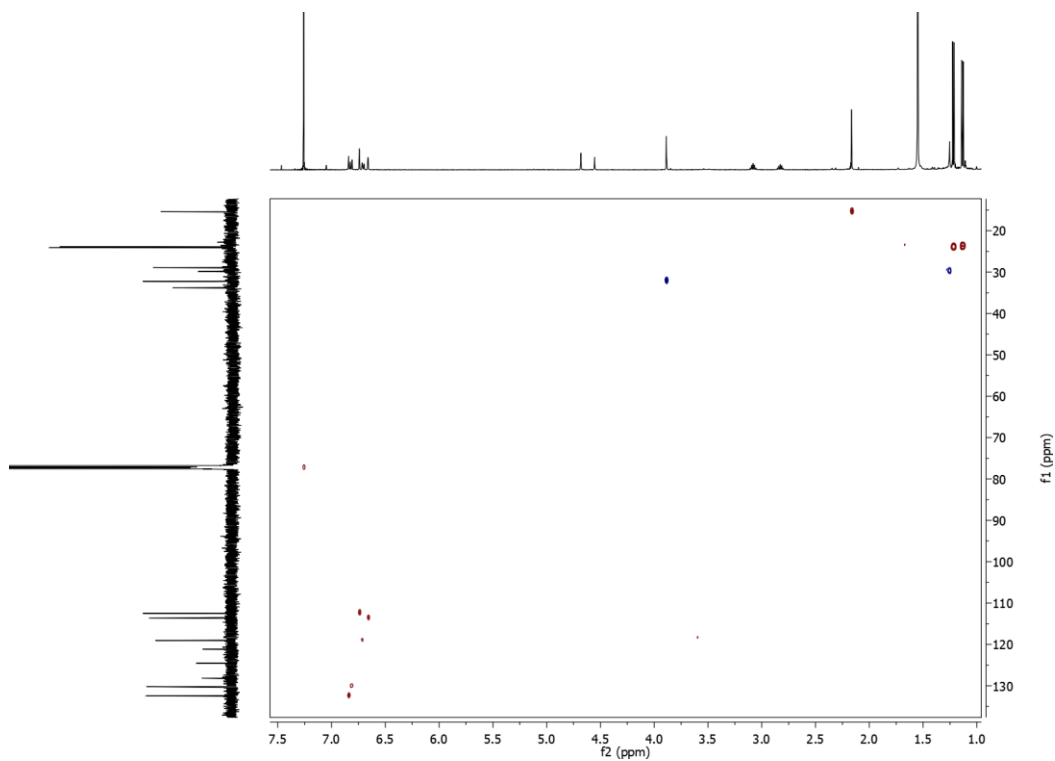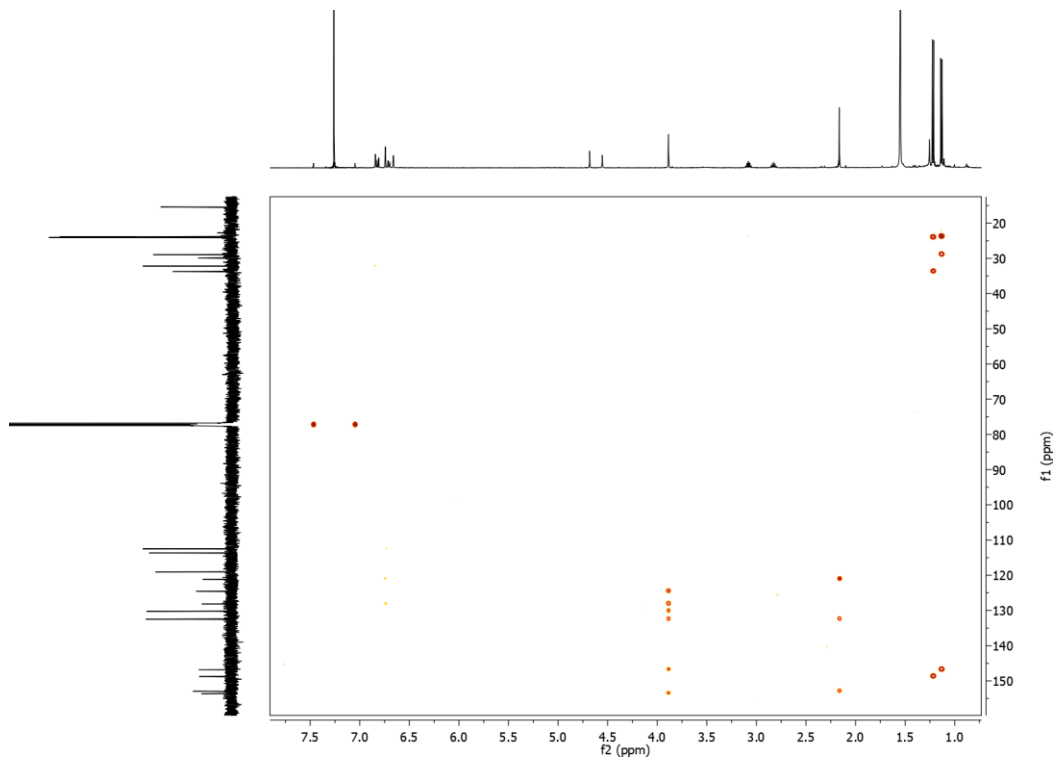

## Elemental Composition Report

### Single Mass Analysis

Tolerance = 2.0 mDa / DBE: min = -1.5, max = 80.0

Element prediction: Off

Number of isotope peaks used for i-FIT = 3

Monoisotopic Mass, Even Electron Ions

96 formula(e) evaluated with 1 results within limits (up to 10 best isotopic matches for each mass)

Elements Used:

C: 0-100 H: 0-100 O: 0-20 Na: 0-1

MEJORADIOL-NEG 489 (4.530)

1: TOF MS ES-

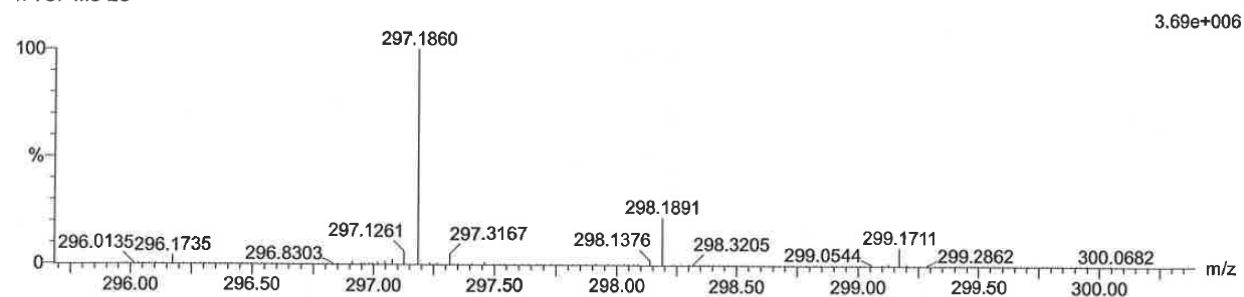

Minimum: -1.5  
Maximum: 2.0 10.0 80.0

| Mass     | Calc. Mass | mDa | PPM | DBE | i-FIT  | Norm | Conf (%) | Formula    |
|----------|------------|-----|-----|-----|--------|------|----------|------------|
| 297.1860 | 297.1855   | 0.5 | 1.7 | 8.5 | 1215.5 | n/a  | n/a      | C20 H25 O2 |

HRMS spectrum of 4 (negative-ion mode)
